# Supplementary material
Source: PubMed Central journal article supplement (PMC5839270)
Supplement: jamapediatr-172-166-s001.pdf [file jamapediatr-172-166-s001.pdf]

## Supplementary Online Content

Beckley AL, Caspi A, Broadbent J, et al. Association of childhood blood lead levels with criminal offending. *JAMA Pediatr*. Published online December 26, 2017. doi:10.1001/jamapediatrics.2017.4005

**eTable 1.** Descriptive Statistics of Full-Scale Self-Reported Offending Variety and Associations of Blood Lead Level With Self-Reported Offending

**eTable 2.** Attrition Analysis Comparing Dunedin Study Members Meeting Study Inclusion Criteria on Primary Variables With and Without Blood Collected at Age 11 Years

**eTable 3.** Model Results and Fit Statistics for Models of Associations of Blood Lead Level With Offending Outcomes

**eTable 4.** Association of Blood Lead Level With Offending Outcomes Using Transformations of the Lead Variable

This supplementary material has been provided by the authors to give readers additional information about their work.

| <b>eTable 1. Descriptive Statistics of Full-Scale Self-Reported Offending Variety and Associations of Blood Lead Level With Self-Reported Offending</b> |                                 |                                                                   |                              |                               |                             |                                                      |                              |
|---------------------------------------------------------------------------------------------------------------------------------------------------------|---------------------------------|-------------------------------------------------------------------|------------------------------|-------------------------------|-----------------------------|------------------------------------------------------|------------------------------|
| Measure                                                                                                                                                 | Descriptive statistics<br>N=553 | Descriptive statistics by blood lead level (BLL) category (µg/dL) |                              |                               |                             | Association with BLL <sup>a</sup> (95% CI) [P value] |                              |
|                                                                                                                                                         |                                 | ≤ 5 µg/dL<br>N=33<br>(6%)                                         | 6-10 µg/dL<br>N=265<br>(48%) | 11-15 µg/dL<br>N=173<br>(31%) | > 15 µg/dL<br>N=82<br>(15%) | Undadjusted                                          | Adjusted for male sex        |
| <b>Self-reported offending variety, mean (SD)</b>                                                                                                       |                                 |                                                                   |                              |                               |                             |                                                      |                              |
| Age 15 years                                                                                                                                            | 2.13 (3.37)                     | 1.39 (2.34)                                                       | 1.95 (3.37)                  | 2.29 (3.33)                   | 2.71 (3.75)                 | .10* (0.02, 0.18)<br>[.019]                          | 0.09* (0.01, 0.17)<br>[.028] |
| Age 18 years                                                                                                                                            | 4.76 (4.59)                     | 3.69 (4.23)                                                       | 4.45 (4.18)                  | 5.13 (4.72)                   | 5.48 (5.59)                 | .09* (0.01, 0.17)<br>[.036]                          | 0.06 (-0.02, 0.14)<br>[.134] |
| Age 21 years                                                                                                                                            | 4.68 (4.22)                     | 4.00 (3.06)                                                       | 4.52 (3.98)                  | 4.84 (4.50)                   | 5.19 (4.80)                 | .06 (-.02, .14)<br>[.145]                            | 0.03 (-0.04, 0.11)<br>[.417] |
| Age 26 years                                                                                                                                            | 3.01 (3.25)                     | 2.03 (1.49)                                                       | 2.75 (3.14)                  | 3.53 (3.59)                   | 3.16 (3.25)                 | .08 (-.01, .16)<br>[.068]                            | 0.04 (-0.03, 0.12)<br>[.250] |
| Age 32 years                                                                                                                                            | 2.32 (2.57)                     | 1.50 (1.83)                                                       | 2.03 (1.83)                  | 3.02 (3.44)                   | 2.10 (2.46)                 | .08 (-.01, .16)<br>[.069]                            | 0.05 (-0.03, 0.13)<br>[.239] |
| Age 38 years                                                                                                                                            | 1.12 (1.74)                     | 0.74 (0.73)                                                       | 1.02 (1.59)                  | 1.41 (2.16)                   | 0.99 (1.44)                 | .04 (-.04, .12)<br>[.359]                            | 0.02 (-0.06, 0.09)<br>[.702] |

Notes: Full Sample N=553. Wave 15: n= 543, wave 18: n=535, wave 21: n=541, wave 26: n=543, wave 32: n=542, wave 38: n=540.  
<sup>a</sup> Standardized β coefficients reported for offending variety regressed on BLL; these estimates can be interpreted as correlation coefficients (*r*).  
\* *P* < .05

**eTable 2.** Attrition Analysis Comparing Dunedin Study Members Meeting Study Inclusion Criteria on Primary Variables With and Without Blood Collected at Age 11 Years

| Measure                                    | Blood lead at age 11 years |                    | P value <sup>a</sup> |
|--------------------------------------------|----------------------------|--------------------|----------------------|
|                                            | Not Collected<br>N=414     | Collected<br>N=553 |                      |
| <b>Primary variables</b>                   |                            |                    |                      |
| <b>Criminal conviction</b>                 |                            |                    | 1.000                |
| No conviction, N (%)                       | 299 (72.2%)                | 399 (72.2%)        |                      |
| Conviction, N (%)                          | 115 (27.8%)                | 154 (27.8%)        |                      |
| <b>Conviction subgroup 1</b>               |                            |                    | .792                 |
| One-time offender, N (%)                   | 46 (11.1%)                 | 68 (12.3%)         |                      |
| Recidivistic offender, N (%)               | 69 (16.7%)                 | 86 (15.6%)         |                      |
| <b>Conviction subgroup 2</b>               |                            |                    | .729                 |
| Nonviolent offender, N (%)                 | 70 (16.9%)                 | 101 (18.3%)        |                      |
| Violent offender, N (%)                    | 45 (10.9%)                 | 53 (9.6%)          |                      |
| Self-reported offending variety, mean (SD) |                            |                    |                      |
| Age 15 years                               | 2.18 (2.80)                | 1.99 (2.82)        | .294                 |
| Age 18 years                               | 4.20 (3.29)                | 4.24 (3.15)        | .859                 |
| Age 21 years                               | 4.21 (3.27)                | 4.22 (3.02)        | .946                 |
| Age 26 years                               | 2.86 (2.76)                | 2.83 (2.55)        | .832                 |
| Age 32 years                               | 2.16 (2.31)                | 2.25 (2.19)        | .554                 |
| Age 38 years                               | 1.20 (1.81)                | 1.10 (1.59)        | .375                 |
|                                            |                            |                    |                      |
| Sex                                        |                            |                    | .072                 |
| Female, N (%)                              | 216 (52.2%)                | 255 (46.1%)        |                      |
| Male, N (%)                                | 198 (47.8%)                | 298 (53.9%)        |                      |
| Childhood socioeconomic status             | 3.69 (1.16)                | 3.80 (1.12)        | .131                 |
| <b>Secondary variables<sup>b</sup></b>     |                            |                    |                      |
| WISC-R childhood full-scale IQ             | 98.72 (15.37)              | 101.10 (14.25)     | .016                 |
| Urban residence                            | 320 (77.3%)                | 501 (90.6%)        | <.001                |

Note: <sup>a</sup> Mean differences tested with Tukey's test. Proportion differences tested with Chi-square or Fisher's exact test.  
<sup>b</sup> Secondary variables: WISC-R childhood full-scale IQ defined as standardized (M = 100, SD = 15) mean IQ score from assessments at ages 7 and 9 years. Urban residence is non-rural residence as determined from childhood address at age 11 years.

**eTable 3.** Model Results and Fit Statistics for Models of Associations of Blood Lead Level With Offending Outcomes

| Measure                                 | Association with BLL <sup>a</sup> |                                  |                                 |                                  | Test of model fit improvement in adjusted model (P value) <sup>c</sup> |
|-----------------------------------------|-----------------------------------|----------------------------------|---------------------------------|----------------------------------|------------------------------------------------------------------------|
|                                         | Unadjusted                        |                                  | Adjusted for male sex           |                                  |                                                                        |
|                                         | Model results (95% CI)[P value]   | Model fit statistic <sup>b</sup> | Model results (95% CI)[P value] | Model fit statistic <sup>b</sup> |                                                                        |
| <b>Criminal conviction</b>              |                                   |                                  |                                 |                                  |                                                                        |
| No conviction, N (%)                    | 1 - reference                     |                                  | 1 - reference                   |                                  |                                                                        |
| Conviction, N (%)                       | 1.29 (1.06, 1.56)<br>[.013]*      | -323.99                          | 1.23 (1.00, 1.51)<br>[.052]     | -301.99                          | <.001                                                                  |
| <b>Conviction subgroup comparison 1</b> |                                   |                                  |                                 |                                  |                                                                        |
| One-time offender, N (%)                | 1.29 (0.99, 1.68)<br>[.058]       | -425.42                          | 1.25 (0.95, 1.64)<br>[.107]     | -401.72                          | <.001                                                                  |
| Recidivistic offender, N (%)            | 1.28 (1.01, 1.63)<br>[.046]*      |                                  | 1.21 (0.93, 1.57)<br>[.149]     |                                  |                                                                        |
| <b>Conviction subgroup comparison 2</b> |                                   |                                  |                                 |                                  |                                                                        |
| Nonviolent offender, N (%)              | 1.33 (1.06, 1.67)<br>[.013]*      | -422.93                          | 1.28 (1.01, 1.61)<br>[.041]*    | -400.42                          | <.001                                                                  |
| Violent offender, N (%)                 | 1.20 (0.89, 1.62)<br>[.241]       |                                  | 1.13 (0.82, 1.55)<br>[.449]     |                                  |                                                                        |
| <b>Self-reported offending variety</b>  |                                   |                                  |                                 |                                  |                                                                        |
| Age 15 years                            | 0.10 (0.02, 0.19)<br>[.016]*      | 0.011                            | 0.10 (0.01, 0.18)<br>[.023]*    | 0.014                            | .181                                                                   |
| Age 18 years                            | 0.09 (0.00, 0.17)<br>[.043]*      | 0.008                            | 0.06 (-0.02, 0.14)<br>[.164]    | 0.106                            | <.001                                                                  |
| Age 21 years                            | 0.04 (-0.04, 0.13)<br>[.296]      | 0.002                            | 0.01 (-0.06, 0.09)<br>[.748]    | 0.124                            | <.001                                                                  |
| Age 26 years                            | 0.09 (0.01, 0.17)<br>[.032]*      | 0.009                            | 0.06 (-0.02, 0.13)<br>[.147]    | 0.143                            | <.001                                                                  |
| Age 32 years                            | 0.08 (-0.01, 0.16)<br>[.076]      | 0.006                            | 0.04 (-0.04, 0.12)<br>[.278]    | 0.108                            | <.001                                                                  |
| Age 38 years                            | 0.04 (-0.04, 0.12)<br>[.320]      | 0.002                            | 0.02 (-0.06, 0.10)<br>[.659]    | 0.065                            | <.001                                                                  |

Notes: Full Sample N=553. Wave 15: n= 543, wave 18: n=535, wave 21: n=541, wave 26: n=543, wave 32: n=542, wave 38: n=540.

<sup>a</sup> For conviction, odds ratio from logistic regression of conviction on blood lead level (BLL) in 5 µg/dL units; reference category is no conviction. For conviction subgroups, odds ratios from multinomial logistic regression models of subgroup on BLL in 5 µg/dL units; reference category is no conviction. For self-reported offending variety, standardized β coefficients reported for offending variety regressed on BLL; these estimates can be interpreted as correlation coefficients (r).

<sup>b</sup> For criminal conviction, log-likelihood is reported. For self-reported offending variety, R<sup>2</sup> is reported.

<sup>c</sup> P values tested for improved of model fit in adjusted model compared to the unadjusted model. For criminal conviction, likelihood ratio tests were used. For offending variety, F-tests were used.

**eTable 4.** Association of Blood Lead Level With Offending Outcomes Using Transformations of the Lead Variable. Table presents the association between childhood blood-lead levels and offending outcomes using different transformations of the blood-lead measure, including logarithmic transformation and a correction for hematocrit levels. Effects are based on standardized (M = 0, SD = 1) BLLs to enable comparison across the models.

|                                                       | Association with BLL <sup>a</sup><br>(95% CI)[P value] |                                 | Association with Log<br>BLL <sup>a</sup><br>(95% CI)[P value] |                                 | Association with<br>hematocrit corrected <sup>a</sup><br>BLL (95% CI)[P value] |                                 |
|-------------------------------------------------------|--------------------------------------------------------|---------------------------------|---------------------------------------------------------------|---------------------------------|--------------------------------------------------------------------------------|---------------------------------|
|                                                       | Unadjusted                                             | Adjusted for<br>male sex        | Unadjusted                                                    | Adjusted for<br>male sex        | Unadjusted                                                                     | Adjusted for<br>male sex        |
| <b>Criminal conviction</b>                            |                                                        |                                 |                                                               |                                 |                                                                                |                                 |
| No conviction                                         | 1 - reference                                          | 1 - reference                   |                                                               |                                 |                                                                                |                                 |
| Conviction                                            | 1.26 (1.05,<br>1.51)<br>[.013]*                        | 1.21 (1.00,<br>1.46)<br>[.052]  | 1.28 (1.06,<br>1.55)<br>[.012]*                               | 1.21 (0.99,<br>1.48)<br>[.060]  | 1.25 (1.04,<br>1.50)<br>[.015]*                                                | 1.21 (0.99,<br>1.46)<br>[.056]  |
| <b>Conviction subgroup<br/>comparison 1</b>           |                                                        |                                 |                                                               |                                 |                                                                                |                                 |
| One-time offender                                     | 1.27 (0.99,<br>1.62)<br>[.058]                         | 1.23 (0.96,<br>1.58)<br>[.107]  | 1.31 (1.01,<br>1.71)<br>[.045]*                               | 1.26 (0.96,<br>1.65)<br>[.090]  | 1.25 (0.97,<br>1.59)<br>[.080]                                                 | 1.21 (0.94,<br>1.55)<br>[.137]  |
| Recidivistic offender                                 | 1.26 (1.00,<br>1.57)<br>[.046]                         | 1.19 (0.94,<br>1.51)<br>[.149]  | 1.25 (0.99,<br>1.59)<br>[.063]                                | 1.17 (0.91,<br>1.50)<br>[.217]  | 1.26 (1.01,<br>1.57)<br>[.044]*                                                | 1.20 (0.95,<br>1.52)<br>[.132]  |
| <b>Conviction subgroup<br/>comparison 2</b>           |                                                        |                                 |                                                               |                                 |                                                                                |                                 |
| Nonviolent offender                                   | 1.30 (1.05,<br>1.60)<br>[.013]*                        | 1.25 (1.01,<br>1.56)<br>[.040]* | 1.31 (1.05,<br>1.64)<br>[.019]*                               | 1.24 (0.99,<br>1.57)<br>[.063]  | 1.28 (1.04,<br>1.57)<br>[.022]*                                                | 1.23 (0.99,<br>1.53)<br>[.059]  |
| Violent offender                                      | 1.18 (0.89,<br>1.56)<br>[.241]                         | 1.12 (0.84,<br>1.50)<br>[.450]  | 1.23 (0.91,<br>1.64)<br>[.176]                                | 1.15 (0.85,<br>1.55)<br>[.371]  | 1.21 (0.92,<br>1.59)<br>[.184]                                                 | 1.15 (0.86,<br>1.54)<br>[.349]  |
| <b>Self-reported offending<br/>variety, mean (SD)</b> |                                                        |                                 |                                                               |                                 |                                                                                |                                 |
| Age 15 years                                          | 0.10 (0.02,<br>0.19)<br>[.016]*                        | 0.10 (0.01,<br>0.18)<br>[.023]* | 0.11 (0.02,<br>0.19)<br>[.013]*                               | 0.10 (0.02,<br>0.19)<br>[.019]* | 0.11 (0.03,<br>0.20)<br>[.010]*                                                | 0.11 (0.02,<br>0.19)<br>[.014]* |
| Age 18 years                                          | 0.09 (0.00,<br>0.17)<br>[.043]*                        | 0.06 (-0.02,<br>0.14)<br>[.164] | 0.10 (0.01,<br>0.18)<br>[.025]*                               | 0.06 (-0.02,<br>0.14)<br>[.130] | 0.10 (0.01,<br>0.18)<br>[.022]*                                                | .07 (-0.01,<br>0.15)<br>[.087]  |
| Age 21 years                                          | 0.05 (-0.04,<br>0.13)<br>[.296]                        | 0.01 (-0.06,<br>0.09)<br>[.748] | 0.05 (-0.03,<br>0.13)<br>[.221]                               | 0.02 (-0.06,<br>0.09)<br>[.692] | 0.05 (-0.04,<br>0.13)<br>[.277]                                                | .02 (-0.06,<br>0.09)<br>[.675]  |
| Age 26 years                                          | 0.09 (0.01,<br>0.18)<br>[.032]*                        | 0.06 (-0.02,<br>0.13)<br>[.147] | .11 (0.03,<br>0.19)<br>[.009]*                                | 0.07 (-0.01,<br>0.15)<br>[.070] | 0.09 (0.01,<br>0.17)<br>[.035]*                                                | .06 (-0.02,<br>0.13)<br>[.139]  |
| Age 32 years                                          | 0.08 (-0.01,<br>0.16)<br>[.076]                        | 0.04 (-0.04,<br>0.12)<br>[.278] | .10 (0.02,<br>0.18)<br>[.017]*                                | 0.07 (-0.01,<br>0.14)<br>[.105] | 0.08 (-0.01,<br>0.16)<br>[.070]                                                | 0.05 (-0.03,<br>0.13)<br>[.244] |
| Age 38 years                                          | 0.04 (-0.04,<br>0.13)<br>[.320]                        | 0.02 (-0.06,<br>0.10)<br>[.659] | 0.07 (-0.01,<br>0.15)<br>[.095]                               | 0.04 (-0.04,<br>0.12)<br>[.299] | 0.05 (-0.03,<br>0.13)<br>[.258]                                                | 0.03 (-0.05,<br>0.10)<br>[.534] |

Notes: Full Sample N=553. Wave 15: n= 543, wave 18: n=535, wave 21: n=541, wave 26: n=543, wave 32: n=542, wave 38: n=540.

<sup>a</sup> For conviction, odds ratio from logistic regression of conviction on blood lead level (BLL) in standardized (M = 0, SD = 1) units; reference category is no conviction. For conviction subgroups, odds ratios from multinomial logistic regression models of subgroup on BLL in standardized (M = 0, SD = 1) units; reference category is no conviction. For self-reported offending variety, standardized  $\beta$  coefficients reported for offending variety regressed on BLL; these estimates can be interpreted as correlation coefficients (*r*).

\*  $P < .05$
